# Supplementary material
Source: publisher figshare collection journal article supplement (https://tandf.figshare.com/ndownloader/files/31583665)
Supplement: Supplementary file 1 [file 31583665]

**A Synergistic Multitargeted of BET and HDAC: An Intra-molecular Mechanism of Communication in treatment of Waldenström macroglobulinemia**

Ghazi Elamin1, Aimen Aljoundi1, and Mahmoud E.S Soliman1*

1Molecular Bio-computation and Drug Design Laboratory

School of Health Sciences, University of KwaZulu-Natal, Westville Campus, Durban 4001,

South Africa

*Corresponding Author: Mahmoud E.S. Soliman

Email: [soliman@ukzn.ac.za](mailto:soliman@ukzn.ac.za)

Telephone: +27 (0) 31 260 8048, Fax: +27 (0) 31 260 78

**Supplementary Figures:**

**
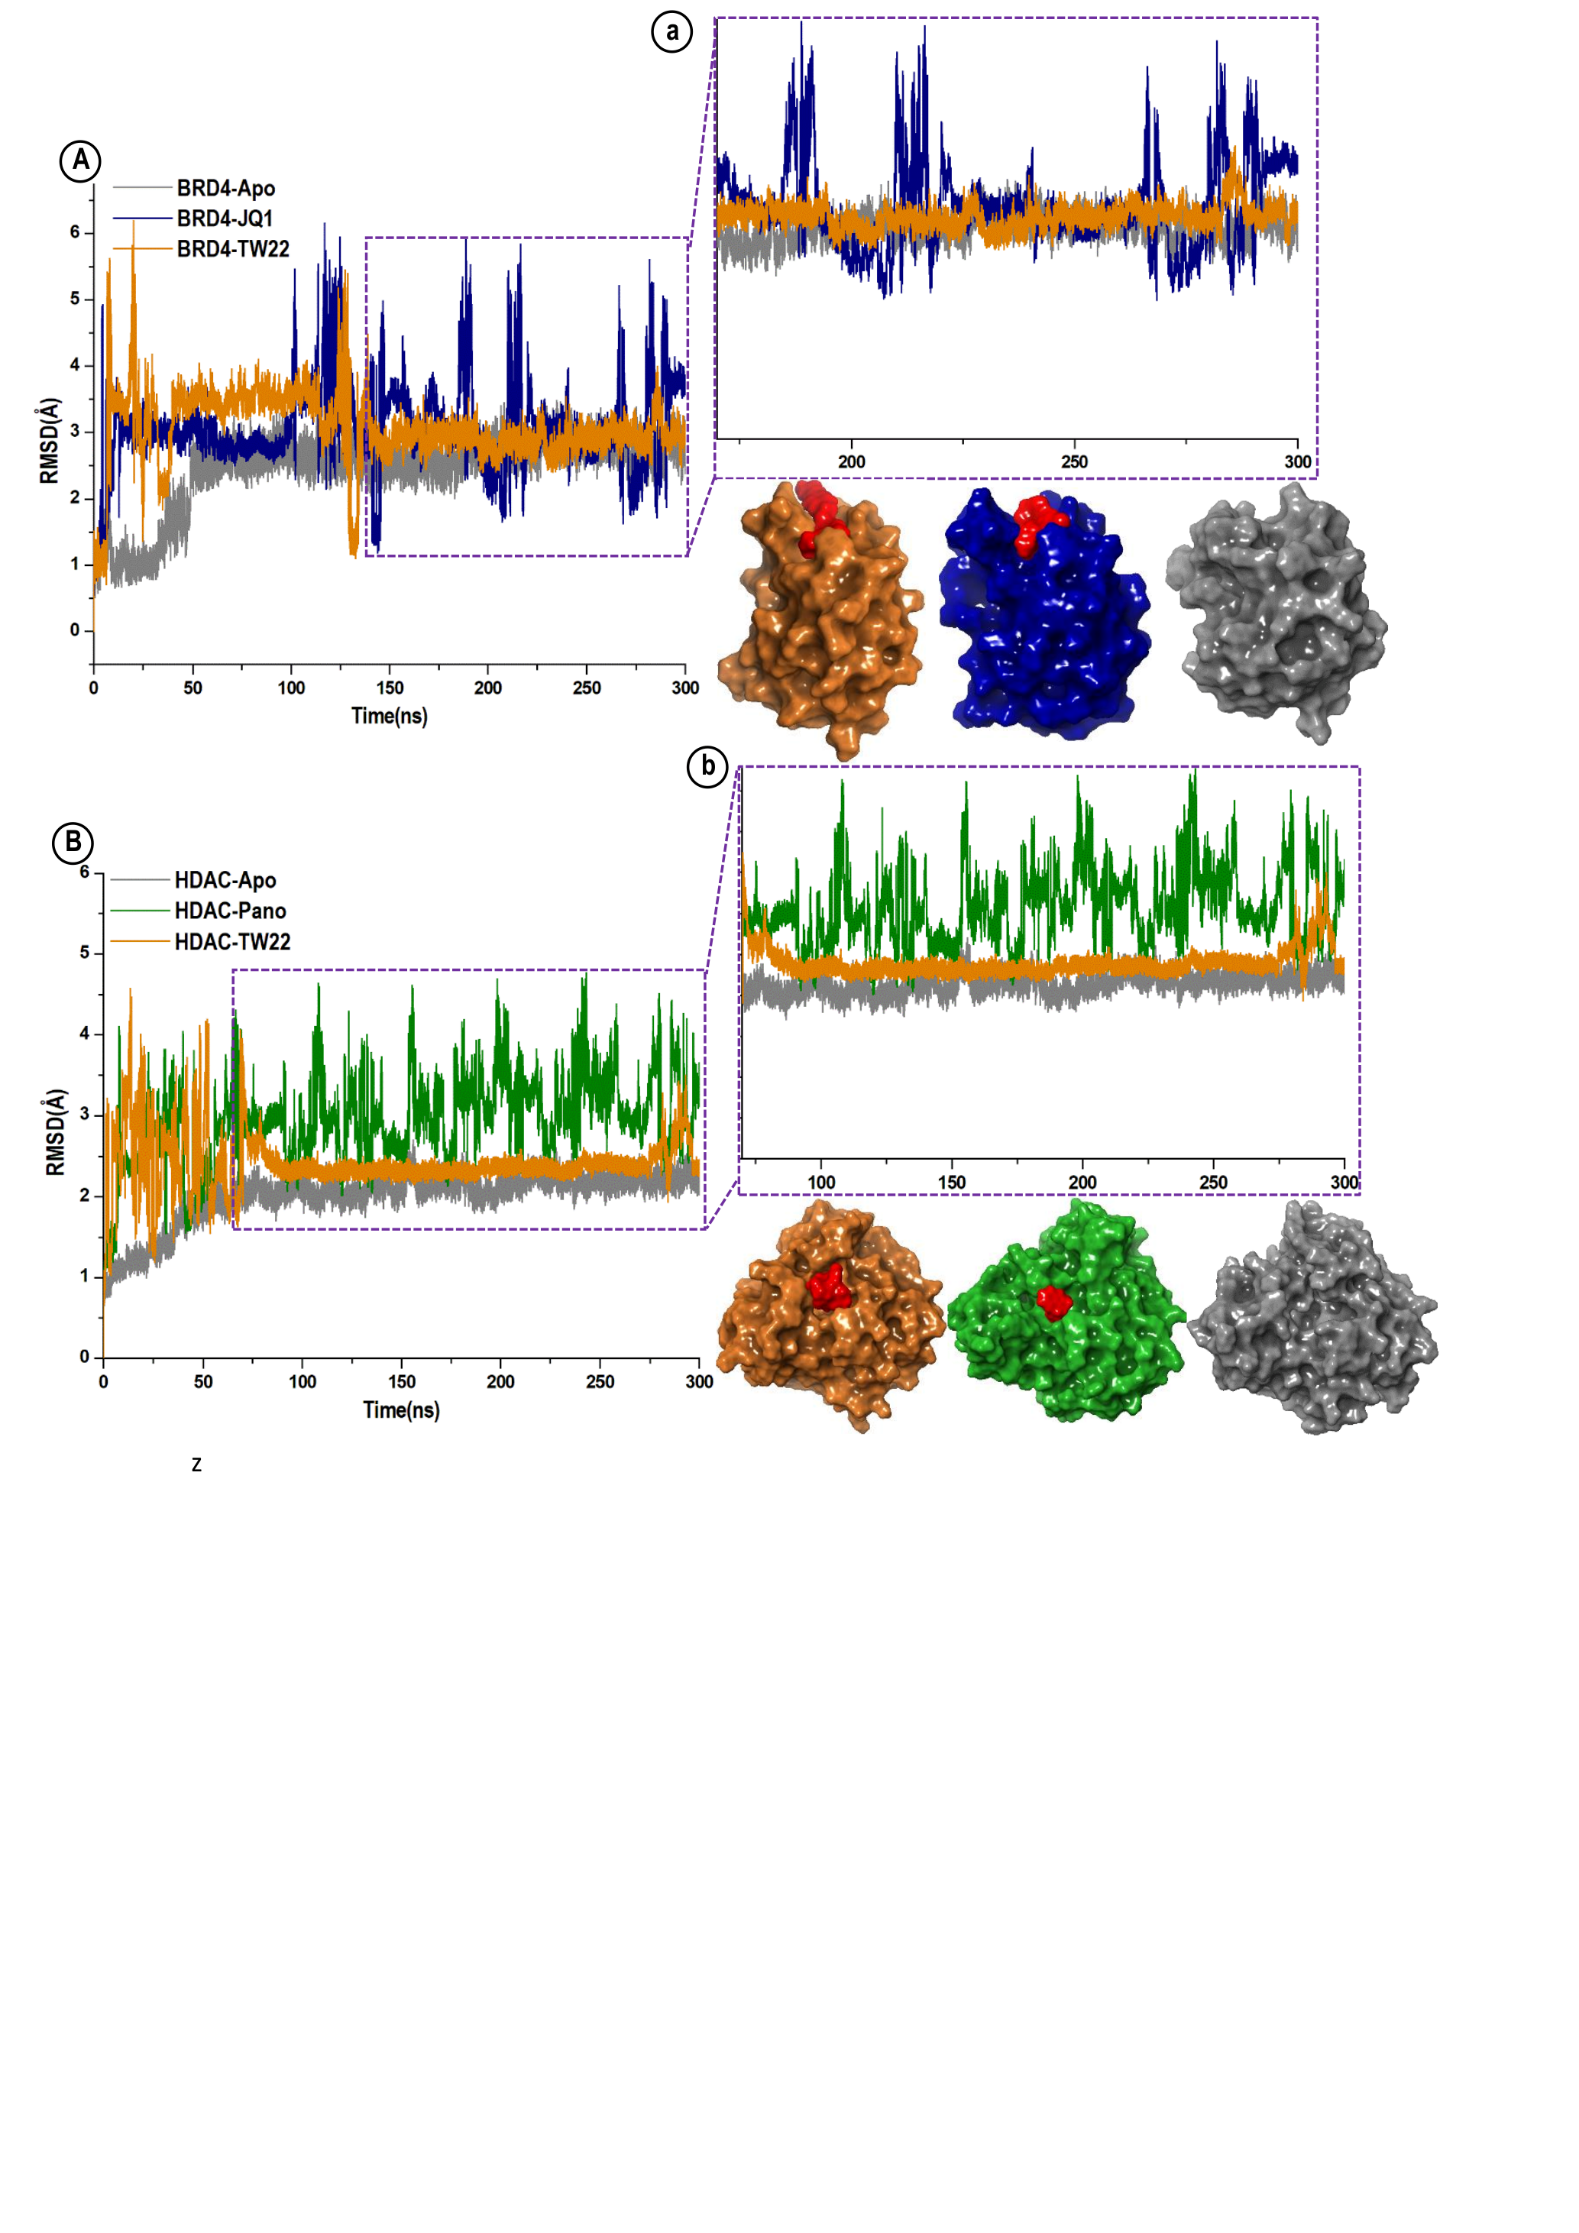
**

**Figure S1.** Comparative C-α RMSD plots showing the degree of stability and convergence of the studied systems over the 300ns MD simulation time. A structure surface view **[A]** BRD4 complexes **[B]** HADC complexes, shows the conformation changes in **[a]** reaching stability point after 125ns for the BRD4-TW22 and BRD4-TW22 complex achieving stability point after 55ns **[b]**.
